# Supplementary material for: Solution-processed Cu2ZnSnS4 thin film with mixed solvent and its application in superstrate structure solar cells
Source: Royal Society of Chemistry journal article supplement (doi:10.1039/c8ra01095a), 2018-01-01
Supplement: c8ra01095a1.pdf [file c8ra01095a1.pdf]

Solution-processed  $\text{Cu}_2\text{ZnSnS}_4$  thin film with mixed solvent and its application in superstrate structure solar cell

Rongjing Yan, Li Kang, Yuxiu Sun\* and Jingbo Zhang\*

Key Laboratory of Inorganic-Organic Hybrid Functional Material Chemistry, Ministry of Education, Tianjin Key Laboratory of Structure and Performance for Functional Molecules, College of Chemistry, Tianjin Normal University, Tianjin 300387, China

\* Corresponding authors.

Jing Bo Zhang

College of Chemistry, Tianjin Normal University, Tianjin 300387, China

[hxxyzjb@mail.tjnu.edu.cn](mailto:hxxyzjb@mail.tjnu.edu.cn)

## Supporting Information

**Table.1S** Summary of EDAS analysis performed in CZTS prepared by the mixing solvent with 1:1 volume ratio of DMF and ethonal.

| Elements             | O     | S    | Ti    | Cu   | Zn   | Sn   | Total |
|----------------------|-------|------|-------|------|------|------|-------|
| Percent of weigh (%) | 47.11 | 3.04 | 37.40 | 4.73 | 2.31 | 5.40 | 100   |
| percent of atom (%)  | 74.07 | 2.39 | 19.64 | 1.87 | 0.89 | 1.14 | 100   |

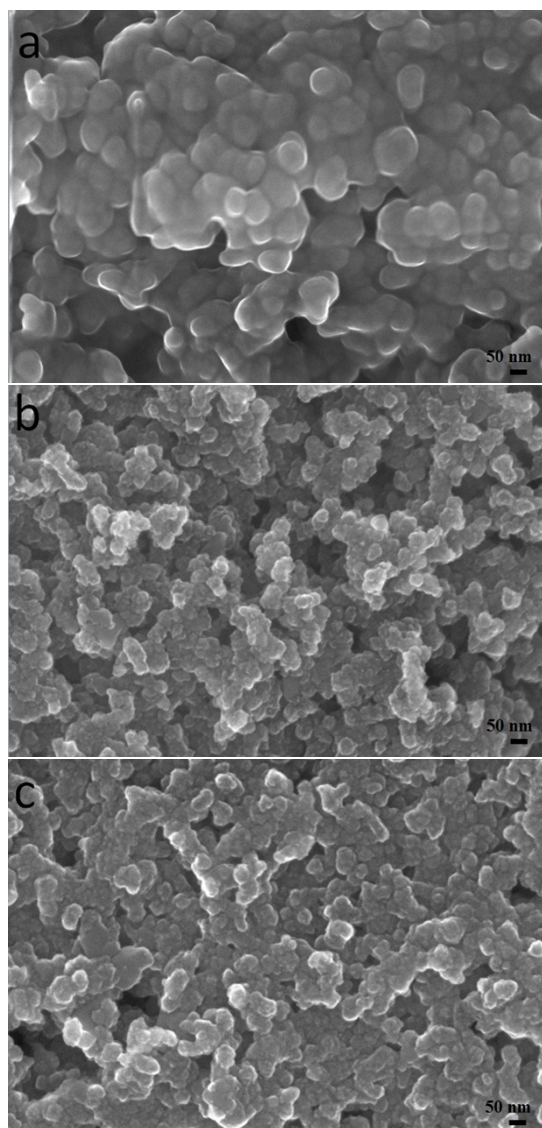

Fig.1S Surface SEM images of CZTS thin films prepared from precursors in DMF (a), DMF:Ethanol=9:1 (b), DMF:Ethanol=1:1 (c).

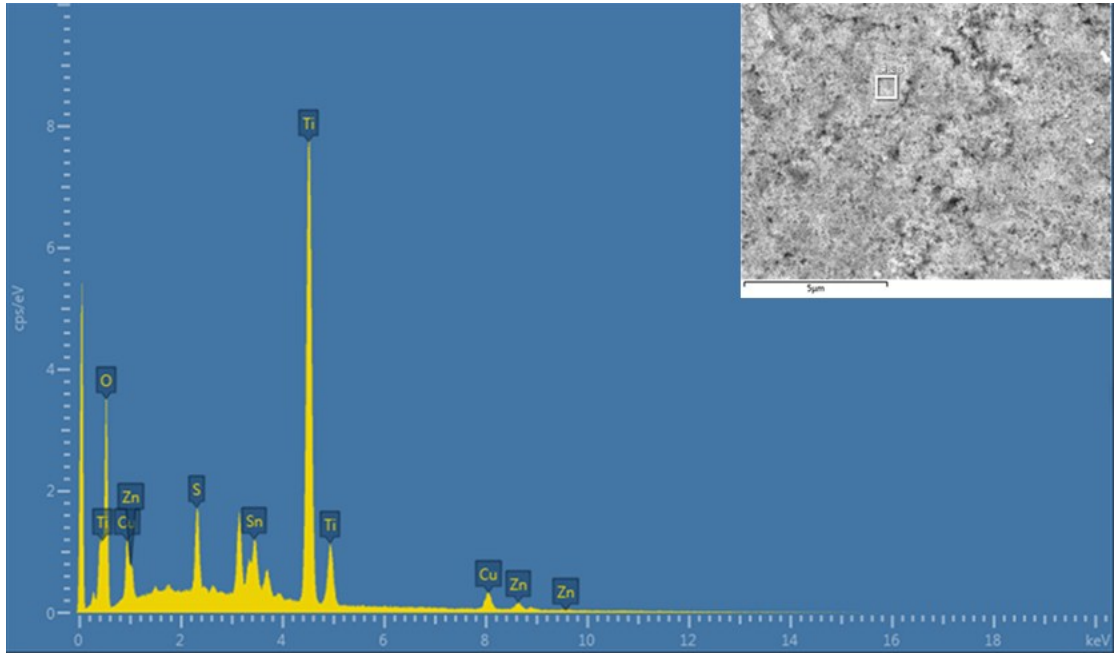

Fig.2S EDAS of the as-obtained CZTS prepared from precursors in DMF:Ethanol=1:1 solvent.

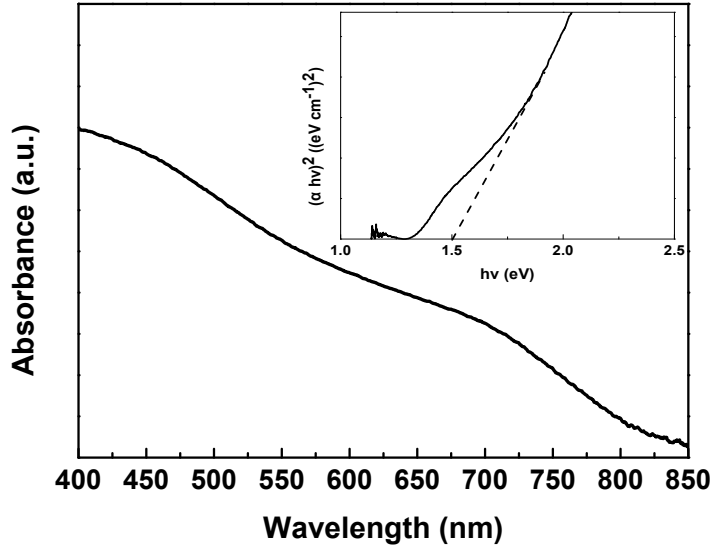

Fig.3S Absorption spectrum of the as-obtained CZTS prepared from precursors in DMF:Ethanol=1:1 solvent.

The absorption spectrum of the sulfurized CZTS prepared from precursors at a sintering temperature of 550°C 1h was characterized, revealing a broad absorption in visible region. The bandgap of CZTS is estimated to be 1.5 eV by plotting  $(ah\nu)^2-h\nu$  (where  $a$  = absorbance,  $h$  = Planck constant and  $\nu$  = frequency), as shown in inset of figure. The band gap energy is estimated by extrapolating the linear, this value is quite close to the theoretical optimal value required for a solar cell.

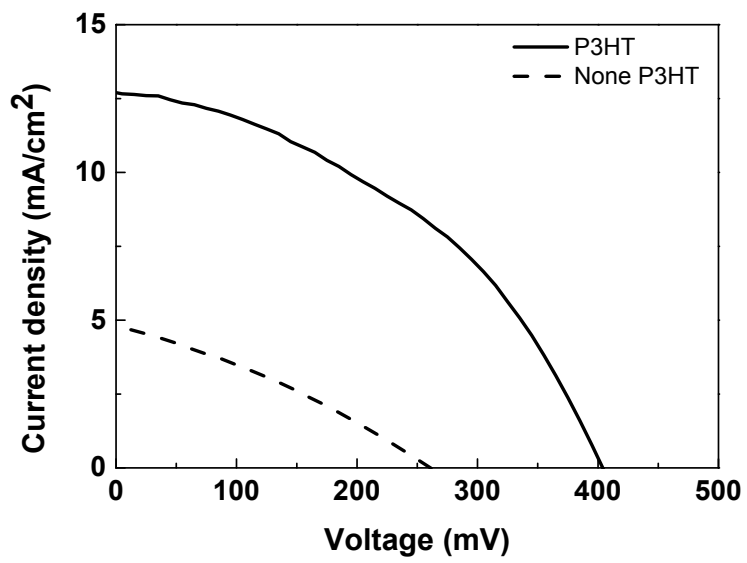

Fig. 4S J-V curves of the superstrate CZTS solar cells with or without hole transfer material.

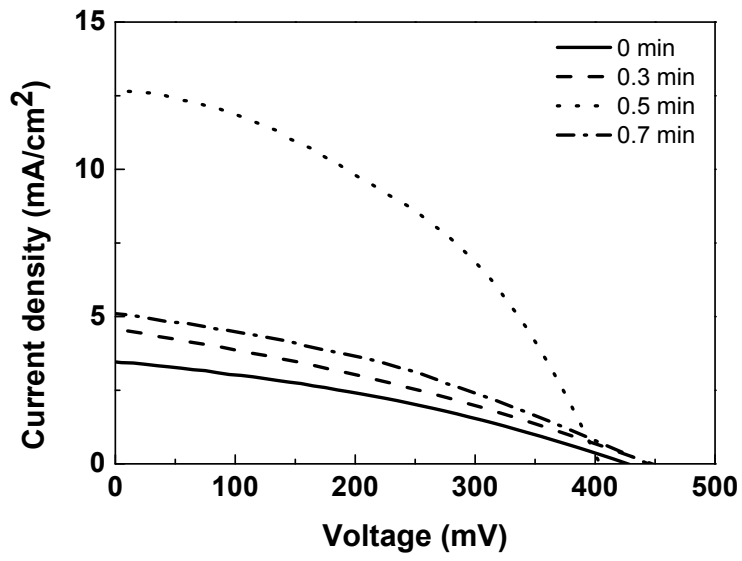

Fig.5S J-V curves of the superstrate CZTS solar cells based on ZnO modification layer electrodeposited for different times.
